# Supplementary material
Source: Springer Nature journal article supplement (https://www.springermedizin.de/resource/supplementary/12936_2007_475_MOESM2_ESM.pdf/9547532)

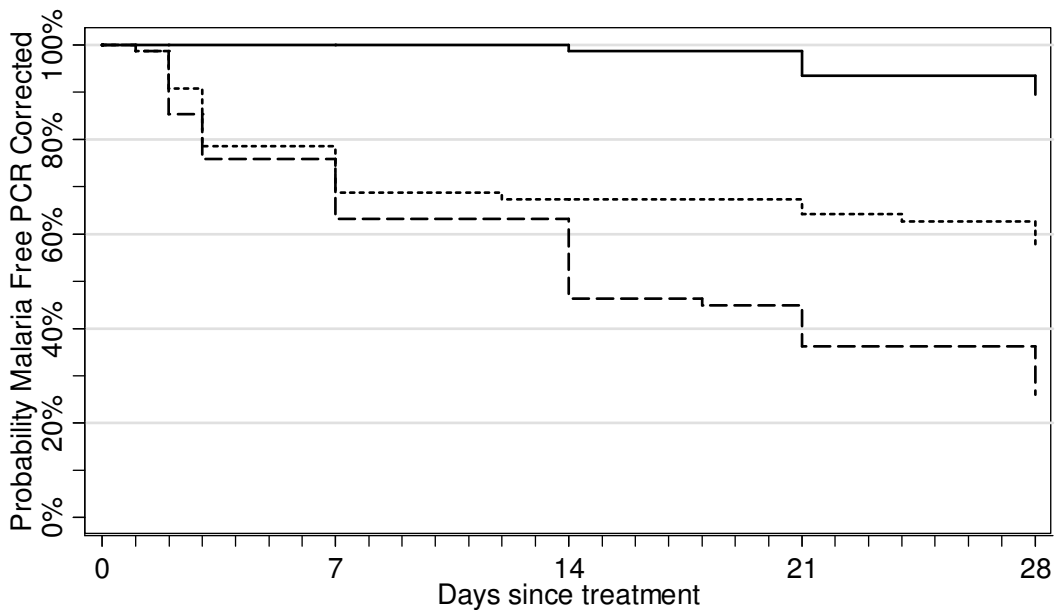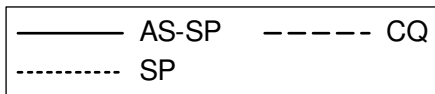

Supplement: MOESM2 [file 9547532]
